# Supplementary material for: Intracranial Aneurysm Classifier Using Phenotypic Factors: An International Pooled Analysis
Source: MDPI journal article supplement (doi:10.3390/jpm12091410), 2022-08-30
Supplement: s1 [file s1]

**Table S1: International Stroke Genetics Consortium-Intracranial Aneurysm Groups (in alphabetical order of the cohort's name)**

| <b>COHORTS</b>              | <b>Coordinating Institution</b>                                                                                                                                                                                                                     |
|-----------------------------|-----------------------------------------------------------------------------------------------------------------------------------------------------------------------------------------------------------------------------------------------------|
| @neurIST_EMC_NL             | Erasmus Medical Center, Rotterdam, The Netherlands                                                                                                                                                                                                  |
| @neurIST_GVA_CH             | Neurosurgery Division, Department of Clinical Neurosciences, Geneva University Hospitals, Geneva, Switzerland                                                                                                                                       |
| @neurIST_HBAR_ES            | Hospital clinic Barcelona and Barcelona hospital General de Catalunya, Barcelona, Spain                                                                                                                                                             |
| @neurIST_MUP_HU             | University of Pecs, Pecs, Hungary                                                                                                                                                                                                                   |
| @neurIST_UOXF_UK            | Radcliffe Infirmary, Oxford, United Kingdom                                                                                                                                                                                                         |
| @neurIST_USFD_UK            | Royal Hallamshire Hospital, Sheffield, United Kingdom                                                                                                                                                                                               |
| ACROSS_AUS                  | Australasian Cooperative Research on Subarachnoid Hemorrhage Study, Australia/New Zealand                                                                                                                                                           |
| BASICMAR_ES                 | IMIM and Hospital del Mar, Barcelona, Spain                                                                                                                                                                                                         |
| CCC_USA                     | University of Cincinnati, College of Medicine, Cincinnati, Ohio, United States of America                                                                                                                                                           |
| FIA1_USA and<br>FIA2_USA    | University of Cincinnati, College of Medicine, Cincinnati, Ohio, United States of America<br>Departments of Neurology and Public Health Sciences, University of Virginia School of Medicine, Charlottesville,<br>Virginia, United States of America |
| FRCAN_CA                    | Montreal Neurological Institute and Hospital, McGill University, Montréal, Quebec, Canada                                                                                                                                                           |
| GERFHS1_USA and GERFHS2_USA | University of Cincinnati, College of Medicine, Cincinnati, Ohio, United States of America                                                                                                                                                           |
| GOSH_UK                     | Stroke Research Centre, University College London Queen Square Institute of Neurology, London, United Kingdom                                                                                                                                       |
| GSA_NL                      | Department of Neurology and Neurosurgery, University Medical Center, Utrecht Brain Center, Utrecht University,<br>Utrecht, The Netherlands                                                                                                          |
| HUCH_FI                     | Department of Neurosurgery, Helsinki University Hospital, University of Helsinki, Finland                                                                                                                                                           |
| ICAN_FR                     | Université de Nantes, CHU Nantes, INSERM, CNRS, l'institut du thorax, Nantes, France<br>CHU Nantes, Department of Neuroradiology, Nantes, France                                                                                                    |
| JUMC_PL                     | Department of Neurology, Faculty of Medicine, Jagiellonian University Medical College, Krakow, Poland                                                                                                                                               |
| KIAD_FI                     | Neurosurgery NeuroCenter Kuopio, University Hospital Kuopio, Finland                                                                                                                                                                                |
| UCSF_USA                    | Department of Neurology, University of California at San Francisco, San Francisco, United States of America                                                                                                                                         |
| UMCU2_NL                    | Department of Neurology and Neurosurgery, University Medical Center, Utrecht Brain Center, Utrecht University,<br>Utrecht, The Netherlands.                                                                                                         |



**Table S2: Characteristics of the different cohorts**

| COHORTS                     | Cohort basis recruitment       | Cohort's inclusion and exclusion criteria                                                                                                                                                                                                                                                                                                                                                                                                                                                                                                                                                                     |
|-----------------------------|--------------------------------|---------------------------------------------------------------------------------------------------------------------------------------------------------------------------------------------------------------------------------------------------------------------------------------------------------------------------------------------------------------------------------------------------------------------------------------------------------------------------------------------------------------------------------------------------------------------------------------------------------------|
| @neurIST_EMC_NL             | Aneurysmal SAH oriented cohort | Patients were recruited based on the diagnosis of IA by angiographic appearance (3D-DSA, 3D-MRA, or 3D-CTA) and by surgical documentation. SAH was verified by CT/MRI or by lumbar puncture. Patient had to be older than 14 years and had to provide consent. Patients with known genetic syndromes predisposing to IA (e.g., polycystic kidney disease or Ehlers-Danlos syndrome Type IV) were excluded from the study.                                                                                                                                                                                     |
| @neurIST_GVA_CH             | Population-based cohort        |                                                                                                                                                                                                                                                                                                                                                                                                                                                                                                                                                                                                               |
| @neurIST_HBAR_ES            | Aneurysmal SAH oriented cohort |                                                                                                                                                                                                                                                                                                                                                                                                                                                                                                                                                                                                               |
| @neurIST_MUP_HU             | Family-oriented IA cohort      |                                                                                                                                                                                                                                                                                                                                                                                                                                                                                                                                                                                                               |
| @neurIST_UOXF_UK            | Aneurysmal SAH oriented cohort |                                                                                                                                                                                                                                                                                                                                                                                                                                                                                                                                                                                                               |
| @neurIST_USFD_UK            | Aneurysmal SAH oriented cohort | Australasian Cooperative Research on Subarachnoid Hemorrhage cohort. None of the patients could be included due to lack of phenotypic patient and aneurysm location and size information.                                                                                                                                                                                                                                                                                                                                                                                                                     |
| ACROSS_AUS                  |                                |                                                                                                                                                                                                                                                                                                                                                                                                                                                                                                                                                                                                               |
| BASICMAR_ES                 | Aneurysmal SAH oriented cohort | Since 2007, all consecutive patients with aSAH confirmed by cerebral angiography who were admitted and treated in Hospital del Mar in Barcelona, Spain were considered for inclusion in the study. Exclusion criteria were nonaneurysmal SAH, SAH due to another cerebral vascular malformation, lack of angiography data, or absence of genetic samples.                                                                                                                                                                                                                                                     |
| CCC_USA                     |                                | Cincinnati control cohort. Data were used to verify the reference population.                                                                                                                                                                                                                                                                                                                                                                                                                                                                                                                                 |
| FIA1_USA and FIA2_USA       | Family-oriented IA cohort      | Families with at least 2 members who had IA were ascertained through 26 clinical centers (41 sites) in North America, New Zealand, and Australia. Exclusion criteria included (i) fusiform-shaped unruptured IA of a major intracranial trunk artery; (ii) IA that is part of an arteriovenous malformation; (iii) family or personal history of polycystic kidney disease, Ehlers Danlos syndrome, Marfan's syndrome, fibromuscular dysplasia, or Moya-Moya disease; or (iv) failure to obtain informed consent from the patient or family members.                                                          |
| FRCAN_CA                    | Population-based cohort        | Participants were recruited in Montréal and Québec City, Canada. Diagnoses were confirmed either by magnetic resonance angiography or by surgical confirmation (clipped or coiled).                                                                                                                                                                                                                                                                                                                                                                                                                           |
| GERFHS1_USA and GERFHS2_USA | Aneurysmal SAH oriented cohort | Patients in three counties in southwest Ohio and two counties in northern Kentucky (greater Cincinnati, Ohio region) whose SAH was confirmed by imaging and who consented to a detailed interview were included.                                                                                                                                                                                                                                                                                                                                                                                              |
| GOSH_UK                     | Aneurysmal SAH oriented cohort | Multicentre UK-wide study involving 20 neurosurgical centres. Included patients with proven IA, including angiographically-proven ruptured IA (irrespective of severity) and unruptured IA. Consent from subject(s) or nominated consultee(s) was obtained for all participants. Excluded patients with known inherited connective tissue disorders, such as Marfan's, Ehlers-Danlos syndrome, and adult polycystic kidney disease, as well as those with non-aneurysmal SAH (e.g., from arterio-venous malformations, trauma, mycotic aneurysms, and peri-mesencephalic SAH where no aneurysm was detected). |



| COHORTS  | Cohort basis recruitment       | Cohort's inclusion and exclusion criteria                                                                                                                                                                                                                                                                                                                                                                                                                                                                                                                                                                                                                           |
|----------|--------------------------------|---------------------------------------------------------------------------------------------------------------------------------------------------------------------------------------------------------------------------------------------------------------------------------------------------------------------------------------------------------------------------------------------------------------------------------------------------------------------------------------------------------------------------------------------------------------------------------------------------------------------------------------------------------------------|
| GSA_NL   | Aneurysmal SAH oriented cohort | Diagnosis of an IA was made either with computerized tomography angiogram, magnetic resonance angiogram, or cerebral digital subtraction angiogram; and was confirmed at surgery when applicable. Rupture of an aneurysm was defined by identification of acute subarachnoid or intracranial hemorrhage (through computerized tomography or magnetic resonance imaging) from a proven aneurysm. Subjects with SAH without saccular IA, non-saccular IA (such as fusiform aneurysms), and those with known genetic syndromes that are believed to predispose to IA (e.g., polycystic kidney disease or Ehlers-Danlos syndrome Type IV) were excluded from the study. |
| HUCH_FI  |                                | Rupture of an aneurysm was defined by identification of acute subarachnoid or intracranial hemorrhage (through computerized tomography or magnetic resonance imaging) from a proven aneurysm. Subjects with subarachnoid hemorrhage without saccular IA, non-saccular IA (such as fusiform aneurysms) and those with known genetic syndromes that are believed to predispose to IA (e.g., polycystic kidney disease or Ehlers-Danlos syndrome Type IV) were excluded from the study.                                                                                                                                                                                |
| ICAN_FR  | Population-based cohort        | Sporadic and familial IA patients were collected. Exclusion criteria were fusiform or dissected IA, or IA related to an arteriovenous malformation. Patients were excluded if they had a family history of ADPKD, ED, Marfan's syndrome, fibromuscular dysplasia, or Moyamoya disease.                                                                                                                                                                                                                                                                                                                                                                              |
| JUMC_PL  | Aneurysmal SAH oriented cohort | IA cases were recruited from patients of the Department of Neurology and the Department of Neurosurgery and Neurotraumatology of the Jagiellonian University in Krakow, Poland. Subjects with ruptured or unruptured IA were recruited. Presence of IA was confirmed by intra-arterial angiogram, CTA, MRA, or intraoperatively.                                                                                                                                                                                                                                                                                                                                    |
| KIAD_FI  |                                | Rupture of an aneurysm was defined by identification of acute subarachnoid or intracranial hemorrhage (through computerized tomography or magnetic resonance imaging) from a proven aneurysm. Subjects with subarachnoid hemorrhage without saccular IA, non-saccular IA (such as fusiform aneurysms) and those with known genetic syndromes that are believed to predispose to IA (e.g., polycystic kidney disease or Ehlers-Danlos syndrome Type IV) were excluded from the study.                                                                                                                                                                                |
| UCSF_USA | Aneurysmal SAH oriented cohort | The University of California, San Francisco recruited a prospective cohort of adult patients with spontaneous SAH due to IA who were admitted to a tertiary-care referral center in San Francisco during 2003 to 2008. Cases were confirmed by non-contrast CT and cerebral angiogram. Exclusion criteria were the same as for the FIA cohort.                                                                                                                                                                                                                                                                                                                      |
| UMCU2_NL | Aneurysmal SAH oriented cohort | Patients diagnosed with an unruptured IA or aneurysmal SAH after 2011 in the University Medical Center Utrecht, The Netherlands, were recruited. Inclusion and exclusion criteria are identical to those of the GSA_NL cohort.                                                                                                                                                                                                                                                                                                                                                                                                                                      |



**Table S3: Categories and definitions of the descriptors used to characterize patients and intracranial aneurysms**

Data were collected prior to definitions established by the Common Data Elements project supported by the National Institute of Health.

Each raw data response was mapped to the appropriate element and standardized to the Common Data Elements definitions.

| Descriptors                            | Categories                        | Definitions                                                                                                                                                                                                                                                                                                                                                                                                                                                                              |
|----------------------------------------|-----------------------------------|------------------------------------------------------------------------------------------------------------------------------------------------------------------------------------------------------------------------------------------------------------------------------------------------------------------------------------------------------------------------------------------------------------------------------------------------------------------------------------------|
| <b>Basis of recruitment</b>            | Subarachnoid hemorrhage           | Patient diagnosed with subarachnoid bleed as a consequence of intracranial aneurysm rupture                                                                                                                                                                                                                                                                                                                                                                                              |
|                                        | Symptomatic intracranial aneurysm | Patient diagnosed initially with a symptom associated with an intracranial aneurysm                                                                                                                                                                                                                                                                                                                                                                                                      |
|                                        | Incidental intracranial aneurysm  | Patient incidentally diagnosed with intracranial aneurysm                                                                                                                                                                                                                                                                                                                                                                                                                                |
|                                        | Case                              | Patients diagnosed with intracranial aneurysm(s) with unknown status of rupture                                                                                                                                                                                                                                                                                                                                                                                                          |
| <b>Sex</b>                             | Female                            | Self-reported sex of the patient. Phenotype female                                                                                                                                                                                                                                                                                                                                                                                                                                       |
|                                        | Male                              | Self-reported sex of the patient. Phenotype male                                                                                                                                                                                                                                                                                                                                                                                                                                         |
| <b>Family History of IA</b>            | Yes                               | One or more 1st-degree relative(s) with intracranial aneurysm                                                                                                                                                                                                                                                                                                                                                                                                                            |
|                                        | No                                | No 1st-degree relative with intracranial aneurysm                                                                                                                                                                                                                                                                                                                                                                                                                                        |
|                                        | Probably                          | A relative had a stroke but there is no definite diagnosis on the type of stroke                                                                                                                                                                                                                                                                                                                                                                                                         |
|                                        | Unknown                           | Unknown familial history of intracranial aneurysm                                                                                                                                                                                                                                                                                                                                                                                                                                        |
| <b>Hypertension status</b>             | AnyType                           | Yes – Untreated blood pressure greater than 140/90 mm Hg, and the patient does not take any antihypertensive treatment<br>Yes – Treated and controlled blood pressure greater than 140/90 mm Hg, the patient takes antihypertensive treatment, and the blood pressure is in normal range<br>Yes – Treated and uncontrolled blood pressure greater than 140/90 mm Hg, the patient takes antihypertensive treatment, but the blood pressure stays higher than normal blood pressure values |
|                                        | Never                             | No – Blood pressure less than 120/80 mm Hg, or patient reports never having been diagnosed with high blood pressure                                                                                                                                                                                                                                                                                                                                                                      |
|                                        | Unknown                           | Hypertension status unknown                                                                                                                                                                                                                                                                                                                                                                                                                                                              |
| <b>Smoking status</b>                  | Current                           | Smoked (more than 300 cigarettes) and has smoked cigarettes with 6 months prior to recruitment                                                                                                                                                                                                                                                                                                                                                                                           |
|                                        | Former                            | Smoked (more than 300 cigarettes), but stopped smoking at least 6 months ago                                                                                                                                                                                                                                                                                                                                                                                                             |
|                                        | No                                | Never smoked, or smoked fewer than 300 cigarettes in lifetime                                                                                                                                                                                                                                                                                                                                                                                                                            |
|                                        | Unknown                           | Smoking status unknown                                                                                                                                                                                                                                                                                                                                                                                                                                                                   |
| <b>Age at time of aneurysm rupture</b> | Age in years                      | Age of patient when intracranial aneurysm ruptured                                                                                                                                                                                                                                                                                                                                                                                                                                       |



| Descriptors                          | Categories                                 | Definitions                                                                                                                                                                                                                                                                                       |
|--------------------------------------|--------------------------------------------|---------------------------------------------------------------------------------------------------------------------------------------------------------------------------------------------------------------------------------------------------------------------------------------------------|
| Multiplicity status                  | N number                                   | Number of diagnosed intracranial aneurysms. In case of multiple aneurysms, the number of aneurysms was recorded if this information was available.                                                                                                                                                |
|                                      | Unknown                                    | Unknown number of aneurysm                                                                                                                                                                                                                                                                        |
|                                      | Multiple aneurysm                          | Yes / No. In case of multiple aneurysms, the ruptured or the most critical aneurysm was identified by the recruiting investigator for the dataset.                                                                                                                                                |
| Ruptured status                      | Yes                                        | Patient known to have a ruptured intracranial aneurysm                                                                                                                                                                                                                                            |
|                                      | No                                         | Patient known to never have a ruptured aneurysm                                                                                                                                                                                                                                                   |
|                                      | Unknown                                    | Rupture status of the aneurysm unknown                                                                                                                                                                                                                                                            |
| Maximum aneurysm diameter at rupture | Decimal                                    | Maximum diameter size in mm                                                                                                                                                                                                                                                                       |
|                                      | Unknown                                    | Maximal diameter unknown                                                                                                                                                                                                                                                                          |
| Aneurysm location                    | <i>Abbreviation used in the manuscript</i> | <i>Location names given in the different cohorts</i>                                                                                                                                                                                                                                              |
|                                      | Acom                                       | Anterior communicating artery, Acomm, ACoA, ACOM, Anterior circulation others, Comm anterior CoA forward, Comm anterior CoA forward-upward, Comm anterior CoA upward, Comm anterior CoA backward, Comm anterior CoA down                                                                          |
|                                      | A2                                         | Distally to the Acom, Pericallosal cerebral artery, A2 segment ant, ACA-Anterior Cerebral Artery, A1-A2, PericalA, Pericallosal proximal, Pericallosal typical                                                                                                                                    |
|                                      | MCA                                        | Middle cerebral artery, Sylvian bifurcation, M1 segment middle cerebral artery, M1 perforator artery, Middle cerebral bifurcation, Middle cerebral MCA main trunk                                                                                                                                 |
|                                      | Pcom                                       | Posterior communicating artery starting proximal to the implantation of the posterior communication artery and extending up to the anterior choroidal artery, Posterior Comm, Pcomm, PcoA, PCOM                                                                                                   |
|                                      | ICA                                        | Internal carotid artery extending from the anterior choroidal artery up to the ICA bifurcation including it, Anterior and superior wall carotid, Carotid bifurcation, Ant Choroidal segment carotid, other location carotid artery, Superior wall ICA, Lateral wall ICA CoP, Lateral wall ICA ChA |
|                                      | cav-ICA                                    | Intracavernous portion of ICA, Cavernous ICA                                                                                                                                                                                                                                                      |
|                                      | ophthI-ICA                                 | Ophthalmic segment of ICA starting immediately proximal to the ophthalmic artery departure and ending immediately proximal to the implantation of the posterior communication artery,                                                                                                             |



|  |              |                                                                                                                                                                                                                                                                                       |
|--|--------------|---------------------------------------------------------------------------------------------------------------------------------------------------------------------------------------------------------------------------------------------------------------------------------------|
|  |              | Medial wall carotid, Ophthalmic Artery, OphtA, AOA, OA, ICA-opht, Medial wall ICA ophthalmic, Medial wall ICA distal, Inferior wall ICA                                                                                                                                               |
|  | A1           | A1 anterior segment: aneurysms located on the anterior cerebral artery distal to the ICA bifurcation but proximal to the anterior communicating artery                                                                                                                                |
|  | Basilar      | Basilar artery, Basilar Tip, basilar artery bifurcation, BA, P1 posterior cerebral                                                                                                                                                                                                    |
|  | VB           | Vertebro-basilar artery, vertebro-basilar junction, V4 segment vertebral artery, Basilar trunk, AICA, Superior cerebellar artery, PICA, vertebral artery, VB-Other Basilar and Vertebral, VA, SCA, Vertebral trunk, Basilar others, Basilar SCA, Vertebral = PICA origin, PICA distal |
|  | PCA          | Posterior cerebral artery, P1 Posterior cerebral artery, P2 posterior cerebral artery, P1-P2 junction posterior cerebral artery. Aneurysms located distally to the basilar bifurcation.                                                                                               |
|  | Other        | Distal to sylvian bifurcation, Distal ant cerebral artery, Distal posterior cerebral artery, other location, Middle cerebral peripheral, Pericallosal distal, P3 posterior cerebral distal                                                                                            |
|  | Infundibulum | Vessel calibre irregularities that could not be clearly identified as aneurysms                                                                                                                                                                                                       |
|  | Unknown      | Unknown                                                                                                                                                                                                                                                                               |



**Table S4: Number of patients with ruptured intracranial aneurysm enrolled in the study following coherent recruitment and known location of their intracranial aneurysm**

| COHORTS          | Number of patients with IA | % of patients in the global cohort | Number of patients with ruptured IAs, N (%) |
|------------------|----------------------------|------------------------------------|---------------------------------------------|
| @neurIST_EMC_NL  | 53                         | 0.7                                | 36 (67.9)                                   |
| @neurIST_GVA_CH  | 266                        | 3.3                                | 146 (54.9)                                  |
| @neurIST_HBAR_ES | 89                         | 1.1                                | 70 (78.7)                                   |
| @neurIST_MUP_HU  | 40                         | 0.5                                | 17 (42.5)                                   |
| @neurIST_UOXF_UK | 67                         | 0.8                                | 52 (77.6)                                   |
| @neurIST_USFD_UK | 33                         | 0.4                                | 24 (72.7)                                   |
| BASICMAR_ES      | 98                         | 1.2                                | 98 (100)                                    |
| FIA1_USA         | 360                        | 4.5                                | 158 (43.9)                                  |
| FIA2_USA         | 675                        | 8.4                                | 290 (43.0)                                  |
| FRCAN_CA         | 9                          | 0.1                                | 7 (77.8)                                    |
| GERFHS1_USA      | 12                         | 0.2                                | 12 (100)                                    |
| GERFHS2_USA      | 32                         | 0.4                                | 32 (100)                                    |
| GOSH_UK          | 2275                       | 28.5                               | 1679 (73.8)                                 |
| GSA_NL           | 945                        | 11.8                               | 653 (69.1)                                  |
| HUCH_FI          | 496                        | 6.2                                | 366 (73.8)                                  |
| ICAN_FR          | 898                        | 11.2                               | 354 (39.4)                                  |
| JUMC_PL          | 497                        | 6.2                                | 423 (85.1)                                  |
| KIAD_FI          | 264                        | 3.3                                | 189 (71.6)                                  |
| UCSF_USA         | 127                        | 1.6                                | 127 (100)                                   |
| UMCU2_NL         | 756                        | 9.5                                | 701 (92.7)                                  |
| <b>TOTAL</b>     | <b>7992</b>                | <b>-</b>                           | <b>5434 (68.0)</b>                          |

aSAH-oriented cohorts: @neurIST\_EMC\_NL, @neurIST\_HBAR\_ES, @neurIST\_UOXF\_UK, @neurIST\_USFD\_UK, BASICMAR\_ES, GERFHS1\_USA, GERFHS2\_USA, GOSH\_UK, GSA\_NL, JUMC\_PL, UCSF\_USA, and UMCU2\_NL.

Family-oriented IA cohorts: @neurIST\_MUP\_HU, FIA1\_USA, FIA2\_USA, HUCH\_FI, and KIAD\_FI.

Population-based cohorts that recruited IA, aSAH, and familial cases: @neurIST\_GVA\_CH, FRCAN\_CA, and ICAN\_FR.



**Table S5 – Consortium members**

| <b><u>The @neurIST project</u></b>                             |                                                                                                                                                                                                                                                                                                                                                                                                                                                                                                                                                                                                                                                                                                                                                                                     |
|----------------------------------------------------------------|-------------------------------------------------------------------------------------------------------------------------------------------------------------------------------------------------------------------------------------------------------------------------------------------------------------------------------------------------------------------------------------------------------------------------------------------------------------------------------------------------------------------------------------------------------------------------------------------------------------------------------------------------------------------------------------------------------------------------------------------------------------------------------------|
| <b><u>Investigators</u></b>                                    | Alejandro Frangi (Universitat Pompeu Fabra. Barcelona, Spain)<br>Philippe Bijlenga (Hôpitaux Universitaire de Genève et Faculté de médecine de Genève. Geneva, Switzerland)<br>Martin Hofmann-Apitius (Fraunhofer Institut Algorithmen und Wissenschaftliches Rechnen. Sankt Augustin, Germany)<br>Rod Hose (Royal Hallamshire Hospital and University of Sheffield. United Kingdom)<br>Guy Lonsdale (NEC Laboratories Europe, IT Research Division. Sankt Augustin, Germany)<br>Antonio Arbona (NEC Laboratories Europe, IT Research Division. Sankt Augustin, Germany)<br>Peer Hasselmeyer (NEC Laboratories Europe, IT Research Division. Sankt Augustin, Germany)<br>Daniel Rüfenacht (Hôpitaux Universitaire de Genève et Faculté de médecine de Genève. Geneva, Switzerland). |
| <b><u>Ethical and legal review committee</u></b>               | Jessica Wright (Durham University Department of Law. United Kingdom)<br>Jeremy Wilkins (Durham University Department of Law. United Kingdom)<br>Derick Beyleveld (Durham University Department of Law. United Kingdom)<br>Bernice Elger (Hôpitaux Universitaire de Genève et Faculté de médecine de Genève. Geneva, Switzerland).                                                                                                                                                                                                                                                                                                                                                                                                                                                   |
| <b><u>Information platform development and maintenance</u></b> | Alan Waterworth (Royal Hallamshire Hospital and University of Sheffield. United Kingdom)<br>Steven Wood (Royal Hallamshire Hospital and University of Sheffield. United Kingdom)<br>Jimison Iavindrasana (Hôpitaux Universitaire de Genève et Faculté de médecine de Genève. Geneva, Switzerland)<br>Rodolphe Meyer (Hôpitaux Universitaire de Genève et Faculté de médecine de Genève. Geneva, Switzerland)<br>Christoph Friedrich (Fraunhofer Institut Algorithmen und Wissenschaftliches Rechnen. Sankt Augustin, Germany)<br>Christian Ebeling (Fraunhofer Institut Algorithmen und Wissenschaftliches Rechnen. Sankt Augustin, Germany).                                                                                                                                       |
| <b><u>Epidemiology and statistics</u></b>                      | Christian Ebeling (Fraunhofer Institut Algorithmen und Wissenschaftliches Rechnen. Sankt Augustin, Germany)<br>Philippe Bijlenga (Hôpitaux Universitaire de Genève et Faculté de médecine de Genève. Geneva, Switzerland)<br>Roelof Risselada (Erasmus University Medical Center. Rotterdam, The Netherlands)<br>Christoph Friedrich (Fraunhofer Institut Algorithmen und Wissenschaftliches Rechnen. Sankt Augustin, Germany)<br>Miriam CJM Sturkenboom (Erasmus University Medical Center. Rotterdam, The Netherlands).                                                                                                                                                                                                                                                           |
| <b><u>Genotyping</u></b>                                       | Carole Proust, François Cambien (Unité Mixte de Recherche (UMR S937) and Pitié-Salpêtrière Post-Genomic Platform (P3S), Institut National de la Santé et de la Recherche Médicale (INSERM), University Pierre and Marie Curie (UPMC). Paris, France).                                                                                                                                                                                                                                                                                                                                                                                                                                                                                                                               |
| <b><u>Participating Centers (In Order of</u></b>               | Hôpitaux Universitaire de Genève et Faculté de médecine de Genève. Geneva, Switzerland (Philippe Bijlenga, Max Jägersberg, Alistair Rogers, Bawarjan Schatlo, Patrick Teta, Nathalie Isidor, Karl Schaller, Vitor Mendes-Pereira, Ana                                                                                                                                                                                                                                                                                                                                                                                                                                                                                                                                               |



|                                       |                                                                                                                                                                                                                                                                                                                                                                                                                                                                                                                                                                                                                                                                                                                                                                                                                                                                                                                                                                                                                                                                                                                                                                                                                                                                                                                                                                                                                                                                                                                                                                                                                                                                                                                                                                                                                                                                                                                                                                                                                                                                                                                                                                                                                                                                                                                                                                                                                                                                                                                                                                   |
|---------------------------------------|-------------------------------------------------------------------------------------------------------------------------------------------------------------------------------------------------------------------------------------------------------------------------------------------------------------------------------------------------------------------------------------------------------------------------------------------------------------------------------------------------------------------------------------------------------------------------------------------------------------------------------------------------------------------------------------------------------------------------------------------------------------------------------------------------------------------------------------------------------------------------------------------------------------------------------------------------------------------------------------------------------------------------------------------------------------------------------------------------------------------------------------------------------------------------------------------------------------------------------------------------------------------------------------------------------------------------------------------------------------------------------------------------------------------------------------------------------------------------------------------------------------------------------------------------------------------------------------------------------------------------------------------------------------------------------------------------------------------------------------------------------------------------------------------------------------------------------------------------------------------------------------------------------------------------------------------------------------------------------------------------------------------------------------------------------------------------------------------------------------------------------------------------------------------------------------------------------------------------------------------------------------------------------------------------------------------------------------------------------------------------------------------------------------------------------------------------------------------------------------------------------------------------------------------------------------------|
| <u>Number of Recruited Patients):</u> | <p>Marcos Gonzalez, Ana Paula Narata, Zsolt Kulcsár, Karl O Lovblad, Daniel A. Rüfenacht)</p> <p>John Radcliffe Hospital, University of Oxford. Oxford, United Kingdom (Julia Yarnold, Paul Summers, Alison Clarke, Gulam Zilani, James Byrne)</p> <p>Hospital Clinic. Barcelona, Spain (Juan Macho, Jordi Blasco)</p> <p>University of Pècs Medical School. Pècs, Hungary (Peter Bukovics, Ferenc Kover, Istvan Hudak, Tamas Doczi)</p> <p>Erasmus University Medical Center. Rotterdam, The Netherlands (Roelof Risselada, Miriam CJM Sturkenboom)</p> <p>Royal Hallamshire Hospital. Sheffield, United Kingdom (Pankaj Singh, Alan Waterworth, Umang Patel, Stuart Coley, Patricia Lawford)</p> <p>Hospital General de Catalunya. San Cugat del Valles, Spain (Teresa Sola, Elio Vivas).</p>                                                                                                                                                                                                                                                                                                                                                                                                                                                                                                                                                                                                                                                                                                                                                                                                                                                                                                                                                                                                                                                                                                                                                                                                                                                                                                                                                                                                                                                                                                                                                                                                                                                                                                                                                                   |
| <b><u>The ICAN Study Group</u></b>    |                                                                                                                                                                                                                                                                                                                                                                                                                                                                                                                                                                                                                                                                                                                                                                                                                                                                                                                                                                                                                                                                                                                                                                                                                                                                                                                                                                                                                                                                                                                                                                                                                                                                                                                                                                                                                                                                                                                                                                                                                                                                                                                                                                                                                                                                                                                                                                                                                                                                                                                                                                   |
| <u>Investigators</u>                  | <p>Hubert Desal, Romain Bourcier, Bertrand Isidor, Jérôme Connault, Pierre Lebranchu, Thierry Le Tourneau – University Hospital of Nantes. Nantes, France.</p> <p>Chrisanthi Papagiannaki – University Hospital of Rouen. Rouen, France.</p> <p>Michel Piotin, Hocine Redjem, Mikael Mazighi, Jean Philippe Desilles – Fondation Rotschild Hospital. Paris, France.</p> <p>Olivier Naggara, Denis Trystram, Myriam Edjlali – Goujon, Grégoire Boulouis, Christine Rodriguez, Waghi Ben Hassen – Saint Anne Hospital. Paris, France.</p> <p>Suzanna Saleme, Charbel Mounayer, Aymeric Rouchaud – University Hospital of Limoges. Limoges, France.</p> <p>Olivier Levrier, Pierre Aguetaz, Xavier Combaz – Clairval Hospital. Marseille, France.</p> <p>Anne Pasco, Vincent l'Allinec – University Hospital of Angers. Angers, France.</p> <p>Marc Bintner, Marc Molho, Pascale Gauthier – University Hospital of La Réunion. Saint-Denis de La Réunion, France.</p> <p>Cyril Chivot – University Hospital of Amiens. Amiens, France.</p> <p>Vincent Costalat, Cyril Darganzil, Alain Bonafé – University Hospital of Montpellier. Montpellier, France.</p> <p>Anne Christine Januel, Caterina Michelozzi, Christophe Cognard, Fabrice Bonneville, Philippe Tall, Jean Darcourt – University Hospital of Toulouse. Toulouse, France.</p> <p>Alessandra Biondi, Cristina Iosif – University Hospital of Besançon. Besançon, France.</p> <p>Jean Christophe Ferre, Jean Yves Gauvrit, François Eugene, Hélène Raoult – University Hospital of Rennes. Rennes, France.</p> <p>Jean Christophe Gentric, Julien Ognard – University Hospital of Brest. Brest, France.</p> <p>René Anxionnat, Benjamin Gory, Serge Bracard, Anne Laure Derelle, Romain Tonnelet – University Hospital of Nancy. Nancy, France.</p> <p>Laurent Spelle, Léon Ikka, Augustin Ozanne, Sophie Gallas, Jildaz Caroff, Nidal Ben Achour, Jacques Moret – Le Kremlin Bicêtre Hospital. Paris, France.</p> <p>Emmanuel Chabert – University Hospital of Clermont-Ferrand. Clermont-Ferrand, France.</p> <p>Jérôme Berge, Gaultier Marnat, Xavier Barreau, Florent Gariel – University Hospital of Bordeaux. Bordeaux, France.</p> <p>Frédéric Clarencon, Eimad Shotar – La Pitié Salpêtrière Hospital. Paris, France.</p> <p>Mohammed Aggour – University Hospital of Saint Etienne. Saint Etienne, France.</p> <p>Frédéric Ricolfi, Adrien Chavent, Pierre Thouant – University Hospital of Dijon. Dijon, France.</p> <p>Pablo Lebidinsky, Brivael Lemogne – Colmar Hospital. Colmar, France.</p> |



|                                                                                                                                                                                                                                                                                                                                                                                                                                                                                                                                                                                                                                                                                                                                                                                                                                 |                                                                                                                                                                                                                                                                                                                                                                                                                                                                                                                                                                                                                                                                                                                                                                                                                                                                                                                                                                                                                                                                                                                                                                                                                                                                                                                                                                                                                                                                                                                                                                                                                                            |
|---------------------------------------------------------------------------------------------------------------------------------------------------------------------------------------------------------------------------------------------------------------------------------------------------------------------------------------------------------------------------------------------------------------------------------------------------------------------------------------------------------------------------------------------------------------------------------------------------------------------------------------------------------------------------------------------------------------------------------------------------------------------------------------------------------------------------------|--------------------------------------------------------------------------------------------------------------------------------------------------------------------------------------------------------------------------------------------------------------------------------------------------------------------------------------------------------------------------------------------------------------------------------------------------------------------------------------------------------------------------------------------------------------------------------------------------------------------------------------------------------------------------------------------------------------------------------------------------------------------------------------------------------------------------------------------------------------------------------------------------------------------------------------------------------------------------------------------------------------------------------------------------------------------------------------------------------------------------------------------------------------------------------------------------------------------------------------------------------------------------------------------------------------------------------------------------------------------------------------------------------------------------------------------------------------------------------------------------------------------------------------------------------------------------------------------------------------------------------------------|
|                                                                                                                                                                                                                                                                                                                                                                                                                                                                                                                                                                                                                                                                                                                                                                                                                                 | <p>Denis Herbreteau, Richard Bibi, Kevin Janot – University Hospital of Tours. Tours, France.</p> <p>Laurent Pierot, Sébastien Soize – University Hospital of Reims. Reims, France.</p> <p>Marc Antoine Labeyrie, Christophe Vandendries, Emmanuel Houdart – Lariboisière Hospital. Paris, France.</p> <p>Appoline Kazemi, Xavier Leclerc, Jean Pierre Pruvo, Nicolas Bricout – University Hospital of Lille. Lille, France.</p> <p>Stéphane Velasco, Samy Boucebcı – University Hospital of Poitiers. Poitiers, France.</p>                                                                                                                                                                                                                                                                                                                                                                                                                                                                                                                                                                                                                                                                                                                                                                                                                                                                                                                                                                                                                                                                                                               |
| <u>Epidemiology and statistics</u>                                                                                                                                                                                                                                                                                                                                                                                                                                                                                                                                                                                                                                                                                                                                                                                              | Christian Dina, Floriane Simonet, Eric Charpentier.                                                                                                                                                                                                                                                                                                                                                                                                                                                                                                                                                                                                                                                                                                                                                                                                                                                                                                                                                                                                                                                                                                                                                                                                                                                                                                                                                                                                                                                                                                                                                                                        |
| <u>Genotyping</u>                                                                                                                                                                                                                                                                                                                                                                                                                                                                                                                                                                                                                                                                                                                                                                                                               | Richard Redon, Gervaise Loirand, Jean-Jacques Schott, Stéphanie Chatel, Emmanuelle Bourcereau, Estelle Baron, Stéphanie Bonnaud.                                                                                                                                                                                                                                                                                                                                                                                                                                                                                                                                                                                                                                                                                                                                                                                                                                                                                                                                                                                                                                                                                                                                                                                                                                                                                                                                                                                                                                                                                                           |
| <b><u>Genetics and Observational Subarachnoid Haemorrhage (GOSH) Study investigators</u></b>                                                                                                                                                                                                                                                                                                                                                                                                                                                                                                                                                                                                                                                                                                                                    |                                                                                                                                                                                                                                                                                                                                                                                                                                                                                                                                                                                                                                                                                                                                                                                                                                                                                                                                                                                                                                                                                                                                                                                                                                                                                                                                                                                                                                                                                                                                                                                                                                            |
| <u>Investigators</u>                                                                                                                                                                                                                                                                                                                                                                                                                                                                                                                                                                                                                                                                                                                                                                                                            | <p>Dr Stephen Bonner. The James Cook University Hospital. Middlesbrough, UK</p> <p>Mr Daniel Walsh. King’s College Hospital NHS Foundation Trust. London, UK.</p> <p>Mr Diederik Bulters. University Hospital Southampton NHS Foundation Trust. Southampton, UK.</p> <p>Mr Neil Kitchen. The National Hospital of Neurology and Neurosurgery. London, UK.</p> <p>Prof Martin Brown. UCL Queen Square Institute of Neurology. London, UK.</p> <p>Ms Joan Grieve. The National Hospital of Neurology and Neurosurgery. London, UK.</p> <p>Mr Gareth Roberts. Royal Preston Hospital. UK.</p> <p>Mr Timothy Jones. St George’s Hospital. London, UK.</p> <p>Mr Giles Critchley. Hurstwood Park Neurological Centre. UK.</p> <p>Prof Pankaj Sharma. Imperial Healthcare, Charing Cross Hospital. London, UK.</p> <p>Mr Richard Nelson. Frenchay Hospital. Bristol, UK.</p> <p>Prof Peter Whitfield. Derriford Hospital. Plymouth, UK.</p> <p>Mr Stuart Ross. Leeds General Infirmary. UK.</p> <p>Mr Hiren Patel. Salford Royal Hospital. UK.</p> <p>Mr Paul Eldridge. The Walton Centre. Liverpool, UK.</p> <p>Dr Kari Saastamoinen. The Royal London Hospital. London, UK.</p> <p>Mr Umang Patel. Sheffield Teaching Hospitals NHS Trust. UK.</p> <p>Dr Enas Lawrance. Mayday Hospital. Croydon, UK.</p> <p>Dr Subha Vandabona. Mount Gould Hospital. Plymouth, UK.</p> <p>Professor David Mendelow. Newcastle University Hospitals NHS Trust.</p> <p>Ms Rachel Teal. Oxford Radcliffe Infirmary. UK.</p> <p>Dr Orlando Warner. Oxford Radcliffe Infirmary. UK.</p> <p>Professor Peter Kirkpatrick. Addenbrooke’s Hospital. Cambridge, UK</p> |
| <b><u>International Stroke Genetics consortium (ISGC)</u></b>                                                                                                                                                                                                                                                                                                                                                                                                                                                                                                                                                                                                                                                                                                                                                                   |                                                                                                                                                                                                                                                                                                                                                                                                                                                                                                                                                                                                                                                                                                                                                                                                                                                                                                                                                                                                                                                                                                                                                                                                                                                                                                                                                                                                                                                                                                                                                                                                                                            |
| <p>Sudha Seshadri. Department of Neurology, Boston University School of Medicine, Framingham Heart Study. Boston, MA, USA</p> <p>Laura Kilarski. University of Cologne. Germany</p> <p>Hyacinth I Hyacinth. Aflac Cancer and Blood Disorder Center, Department of Pediatrics, Emory University School of Medicine. Atlanta, GA, USA</p> <p>Jamary Oliveira-Filho. Stroke and Cardiomyopathy Clinics, Federal University of Bahia, Brazilian National Research Committee (CNPq), Instituto Nacional de Ciencia e Tecnologia em Doencas Tropicais (INCT-DT). Salvador, Brazil</p> <p>Sandro Marini. Center for Human Genetic Research, Harvard Medical School. Boston, MA, USA</p> <p>Sunaina Yadav. Imperial College Cerebrovascular Research Unit, Department of Clinical Neuroscience, Imperial College London. London, UK</p> |                                                                                                                                                                                                                                                                                                                                                                                                                                                                                                                                                                                                                                                                                                                                                                                                                                                                                                                                                                                                                                                                                                                                                                                                                                                                                                                                                                                                                                                                                                                                                                                                                                            |



Paul Nyquist. Department of Anesthesiology and Critical Care Medicine, Johns Hopkins Medicine. Baltimore, MD, USA

Cathryn Lewis. Department of Medical and Molecular Genetics, King's College London, SGDP Centre, Institute of Psychiatry, Psychology & Neuroscience, King's College London. London, UK

Bjorn Hansen. Department of Clinical Sciences Lund, Neurology, Lund University, Department of Neurology and Rehabilitation Medicine, Skåne University Hospital. Lund, Sweden

Bo Norrving. Sahlgrenska Academy at University of Gothenburg, Lund University, Department of Neurology and Rehabilitation Medicine, Skåne University Hospital. Lund, Sweden

Gustav Smith. Department of Clinical Sciences Lund, Cardiology, Lund University, The Section for Heart Failure and Valvular Disease, VO Heart and Lung medicine, Skane University Hospital. Lund, Sweden

Jonathan Rosand. Department of Neurology, Massachusetts General Hospital, Center for Human Genetic Research. Massachusetts General Hospital (MGH). Boston, MA, USA

Alessandro Biffi. Division of Behavioral Neurology, Department of Neurology, Massachusetts General Hospital, Center for Human Genetic Research, Massachusetts General Hospital (MGH). Boston, MA, USA

Christina Kourkoulis. Department of Neurology, Massachusetts General Hospital, Center for Human Genetic Research, Massachusetts General Hospital (MGH). Boston, MA, USA

Chris Anderson. Center for Genomic Medicine, Massachusetts General Hospital (MGH), J. Philip Kistler Stroke Research Center, Department of Neurology, Massachusetts General Hospital (MGH). Boston, MA, USA

Anne-Katrin Giese. Department of Neurology, Massachusetts General Hospital, Harvard Medical School, Department of Neurology, J. Philip Kistler Stroke Research Center, MGH. Boston, MA, USA

Ralph Sacco. Department of Neurology, Miller School of Medicine, University of Miami. Miami, FL, USA

Pankaj Sharma. Institute of Cardiovascular Research, Royal Holloway University of London. London, UK

Oh Young Bang. Department of Neurology, Samsung Medical Center, Sungkyunkwan University School of Medicine. Seoul, Korea

Jong-Won Chung. Department of Neurology, Samsung Medical Center, Sungkyunkwan University School of Medicine. Seoul, Korea

Gyeong-Moon Kim. Department of Neurology, Samsung Medical Center, Sungkyunkwan University School of Medicine. Seoul, Korea

Qishuai Zhuang. Department of Pharmacology, School of Life Science and Biopharmaceutical Sciences, Shenyang Pharmaceutical University. Shenyang, China

Wayne Sheu. Department of Internal Medicine, Taichung Veterans General Hospital. Taichung, Taiwan

Steven Lubitz. Department of Cardiology, Massachusetts General Hospital, Harvard Medical School. Boston, MA, USA

David Werring. Stroke Research Centre, Department of Brain Repair and Rehabilitation, University College London Institute of Neurology. London, UK

John Hardy. Reta Lila Weston Institute, UCL Institute of Neurology, University College London. London, UK

June Smalley. Reta Lila Weston Institute, UCL Institute of Neurology, University College London. London, UK

Romain Bourcier. Department of Neuroradiology, University Hospital of Nantes. Nantes, France

Joanna Howson. MRC/BHF Cardiovascular Epidemiology Unit, Department of Public Health and Primary Care, University of Cambridge. Cambridge, UK

Alessandra Granata. Department of Clinical Neurosciences, University of Cambridge. Cambridge, UK

Anna Drazzyk. Department of Clinical Neurosciences, University of Cambridge. Cambridge, UK

Hugh Markus. Stroke Research Group, Division of Clinical Neurosciences, University of Cambridge. Cambridge, UK

Joanna Wardlaw. Neuroimaging Sciences, University of Edinburgh, Centre for Clinical Brain Sciences, University of Edinburgh. Edinburgh, UK



Braxton Mitchell. Department of Medicine, University of Maryland School of Medicine, Geriatrics Research and Education Clinical Center, Baltimore Veterans Administration Medical Center. Baltimore, MD, USA

John Cole. Department of Neurology, University of Maryland School of Medicine and Baltimore VAMC. Baltimore, MD, USA

Anbupalam Thalamuthu. Centre for Healthy Brain Ageing, Psychiatry, University of New South Wales (UNSW). Sydney, NSW, Australia

Jemma Hopewell. Clinical Trial Service Unit and Epidemiological Studies Unit, Nuffield Department of Population Health, University of Oxford. Oxford, UK

Robin Walters. Clinical Trial Service Unit and Epidemiological Studies Unit, Nuffield Department of Population Health, University of Oxford. Oxford, UK

Iain Turnbull. Clinical Trial Service Unit and Epidemiological Studies Unit, Nuffield Department of Population Health, University of Oxford. Oxford, UK

Bradford Worrall. Departments of Neurology and Public Health Sciences, University of Virginia School of Medicine. Charlottesville, VA, USA

Josh Bis. Cardiovascular Health Research Unit, Department of Medicine, University of Washington. Seattle, WA, USA

David Tirschwell. Comprehensive Stroke Care at the UW Medicine Stroke Center at Harborview Medical Center, University of Washington. Seattle, WA, USA

Alex Reiner. Department of Epidemiology, University of Washington, Fred Hutchinson Cancer Research Center, University of Washington. Seattle, WA, USA

Raj Dhar. Department of Neurology, Washington University School of Medicine. St. Louis, MO, USA

Laura Heitsch. Department of Neurology, Radiology, and Biomedical Engineering, Washington University School of Medicine. St. Louis, MO, USA

Jin-Moo Lee. Department of Neurology, Radiology, and Biomedical Engineering, Washington University School of Medicine. St. Louis, MO, USA

Janne Mortenson. Department of Neurology, Aarhus University Hospital. Aarhus, Denmark

Sylvia Wassertheil-Smoller. Department of Epidemiology and Population Health, Albert Einstein College of Medicine. New York, NY, USA

Kameshwar Prasad. Department of Neurology and Stroke Unit, Director of Clinical Epidemiology, All India Institute of Medical Sciences (AIIMS). New Delhi, India

Mark Fisher. Department of Neurology, University of Massachusetts Medical School. Worcester, MA, USA

Christopher Traenka. Neurology Clinic, Basel University Hospital. Basel, Switzerland

Xingwu Wang. Beijing Hypertension League Institute. Beijing, China

Yongjun Wang. Center of Stroke, Beijing Institute for Brain Disorders, Department of Neurology, Beijing Tiantan Hospital, Capital Medical University. Beijing, China

Francois Rouanet. Department of Neurology, Bordeaux University Hospital. Bordeaux, France

Igor Sibon. Department of Neurology, Bordeaux University Hospital. Bordeaux, France

Chloé Sarnowski. Department of Biostatistics, Boston University. Boston, MA, USA

Pauline Maillard. Department of Neurology, University of California at Davis. Davis, CA, USA

Aleksandra Pikula. Department of Neurology, University of Toronto. Toronto, Ontario, Canada

Hugo Javier Aparicio. Department of Neurology, Boston University School of Medicine. Boston, MA, USA

Philip Wolf. Boston University School of Medicine. Boston, MA, USA

Josee Dupuis. Boston University School of Public Health. Boston, MA, USA

Qiong Yang. Boston University School of Public Health. Boston, MA, USA

Gustavo Luvizutto. Rehabilitation department, Botucatu Medical School, Botucatu School of Medicine, University Estadual Paulista Júlio de Mesquita Filho, District of Rubião Junior. Botucatu, Brazil

Daniel Chasman. Division of Preventive Medicine, Brigham and Women's Hospital, Harvard Medical School. Boston, MA, USA

Kathryn Rexrode. Department of Medicine, Brigham and Women's Hospital, Harvard Medical School. Boston, MA, USA



Andrea Harriot. Department of Neurology, Brigham and Women's Hospital, Massachusetts General Hospital. Boston, MA, USA

Chia-Ling Phuah. Center for Human Genetic Research, Massachusetts General Hospital (MGH), Division of Neurocritical Care and Emergency Neurology, Department of Neurology. Boston, MA, USA

Gustavo Santo. Stroke Unit, Centro Hospitalar e Universitário de Coimbra, CHUC. Coimbra, Portugal

Ales Tomek. Department of Neurology, 2nd Faculty of Medicine, Charles University in Prague and Motol University Hospital. Prague, Czech Republic

Jen Gerard. Department of Cardiology, Children's Hospital of Wisconsin. Milwaukee, WI, USA

Cara Carty. Children's Research Institute, Children's National Medical Center, Center for Translational Science, George Washington University. Washington, DC, USA

Guiyou Liu. Chinese Academy of Sciences (CAS). Beijing, China

Sanjith Aaron. Department of Neurological Sciences, Christian Medical College. Vellore, India

Christhunesa S. Christudass. Department of Neurological Sciences, Christian Medical College. Vellore, India

BSB Salomi. Department of Neurological Sciences, Christian Medical College. Vellore, India

Dharambir Sanghera. Department of Pediatrics, College of Medicine, University of Oklahoma Health Sciences Center, Department of Pharmaceutical Sciences, College of Pharmacy, University of Oklahoma Health Sciences Center. Oklahoma City, OK, USA

Amelia Boehme. Department of Neurology, Columbia University. New York, NY, USA

Mitchell Elkind. Neurological Institute of New York, Columbia University College. New York, NY, USA

Gudmar Thorleifsson. DeCODE genetics/AMGEN inc. Reykjavik, Iceland

Solveig Gretarsdottir. DeCODE genetics/AMGEN inc. Reykjavik, Iceland

Leslie Lange. University of Colorado Denver – Anschutz Medical Campus. Denver, CO, USA

Natalia Rost. Department of Neurology, Massachusetts General Hospital, Harvard Medical School, Department of Neurology, J. Philip Kistler Stroke Research Center, MGH. Boston, MA, USA

Michael James. Translational Acute Brain Injury Research Center, Duke University. Durham, NC, USA

Jill Stewart. Department of Neurology, Duke University School of Medicine. Durham, NC, USA

Larry Goldstein. Department of Medicine, Duke Stroke Center, Duke University School of Medicine. Durham, NC, USA

Salina Waddy. Cardiovascular and Stroke Genetics Working Group. Emory University, Atlanta, GA, USA

Carla Ibrahim-Verbaas. Department of Neurology, Erasmus MC. Rotterdam, Netherlands

Dina Vojinovic. Department of Epidemiology, Erasmus MC, University Medical Center Rotterdam, Clinic for Neurology and Psychiatry for Children and Youth, University of Belgrade, Faculty of Medicine. Rotterdam, Netherlands

Arfan Ikram. Department of Epidemiology, Erasmus University Medical Center. Rotterdam, Netherlands

Hieab Adams. Department of Epidemiology, Erasmus University Medical Center. Rotterdam, Netherlands

Fadi Charchar. L.E.W. Carty Cardiovascular Genomics laboratory, Federation University Australia. Ballarat, Australia

Vincent Thijs. Stroke Division, Florey Institute of Neuroscience and Mental Health, Department of Neurology, Austin Health. Heidelberg, Australia

Eugenio Parati. Laboratory of Cellular Neurobiology, Fondazione IRCCS Istituto Neurologico C. Besta, Cerebrovascular Disease Unit, Cerebrovascular Disease Unit, Fondazione IRCCS Istituto Neurologico C. Besta. Milan, Italy

Giorgio Boncoraglio. Department of Cerebrovascular Diseases, Fondazione IRCCS Istituto Neurologico Carlo Besta. Milan, Italy

Charles Kooperberg. Division of Public Health Sciences, Fred Hutchinson Cancer Research Center. Seattle, WA, USA

Sherrine Abboud. Laboratory of Experimental Neurology, Free University of Brussels (ULB). Brussels, Belgium

Ramin Zand. Department of Neuroscience, Geisinger Health System. Danville, PA, USA



Philippe Bijlenga. Departement des neurosciences cliniques, Clinique de neurochirurgie, Geneva University Hospital. Geneva, Switzerland

Magdy Selim. Beth Israel Deaconess Medical Center, Harvard Medical School. Boston, MA, USA

Caspar Grond-Ginsbach. Department of Neurology, Heidelberg University Hospital. Heidelberg, Germany

Olli Hoppola. Department of Neurology, Helsinki University Central Hospital. Helsinki, Finland

Daniel Strbian. Department of Neurology, Helsinki University Central Hospital, Clinical Neurosciences, Neurology, University of Helsinki. Helsinki, Finland

Liisa Tomppo. Department of Neurology, Helsinki University Central Hospital. Helsinki, Finland

Hanne Sallinen. Department of Neurology, Helsinki University Hospital. Helsinki, Finland

Abhishek Pathak. Department of Neurology, Heritage Hospital, Department of Neurology, Neuro Expert Clinic. Varanasi, India

Dorothea Pfeiffer. Department of Neurology, Heidelberg University Hospital. Heidelberg, Germany

Pablo Bonardo. Department of Neurology, Hospital Británico de Buenos Aires. Ciudad Autónoma de Buenos Aires, Argentina

Joao Jose Freitas de Carvalho. Hospital Geral de Fortaleza/SUS Fortaleza. Ceará, Brazil

Priscila Ribeiro. Hospital Governador Celso Ramos. Florianópolis, Brazil

Nuria Torres. Stroke Pharmacogenomics and Genetics, Hospital Mútua de Terrassa, Fundació Docència i Recerca Mútua Terrassa. Terrassa, Spain

Miguel Barboza. Department of Neurology, Hospital Rafael A. Calderon Guardia. San Jose, Costa Rica

Melanie Laarman. Cardiac Development and Genetics Group, Hubrecht Institute. Utrecht, Netherlands

Roberta Carriero. Inflammation and immunology laboratory, Humanitas Clinical Institute. Pavia, Italy

Elizabeth Holliday. Public Health Stream, Hunter Medical Research Institute, Faculty of Health and Medicine, University of Newcastle. New Lambton, Australia

Androniki Plomaritoglou. Neurology, Hygeia Hospital. Marousi, Greece

Johan Björkengren. Department of Genetic and Genomic Sciences, Icahn School of Medicine. New York, NY, USA

Yu-Feng Yvonne Chan. Department of Genetic and Genomic Sciences, Icahn School of Medicine, Mount Sinai. New York, NY, USA

Villi Gudnason. Icelandic Heart Association Research Institute, Faculty of Medicine, University of Iceland. Kopavogur, Iceland

Jordi Jimenez-Conde. Neurovascular Research Group (NEUVAS). Neurology Department, IMIM–Hospital del Mar. Barcelona, Spain

Carolina Soriano. Department of Neurology, Neurovascular Research Group, IMIM–Hospital del Mar. Barcelona, Spain

Jaume Roquer. Neurology Service, IMIM–Hospital del Mar, Institut Hospital del Mar d'investigacions Mèdiques. Barcelona, Spain

Paul Bentley. Faculty of Medicine, Department of Medicine, Imperial College London. London, UK

Dipender Gill. Centre for Pharmacology and Therapeutics, Imperial College London. London, UK

Ganesh Chauhan. Centre for Brain Research, Indian Institute of Science. Bangalore, India

Elisabeth Tournier-Lasserre. UMR-S 740, INSERM. Paris, France

Sara Kaffashian. INSERM U1219 Bordeaux Population Health Research Center. Bordeaux, France

Cecilia Samieri. INSERM U1219 Bordeaux Population Health Research Center, ISPED, University of Bordeaux. Bordeaux, France

Carole Dufouil. INSERM U1219 Bordeaux Population Health Research Center, Department of Public Health, CHU Bordeaux. Bordeaux, France

Stephanie Debette. INSERM U1219 Bordeaux Population Health Research Center, Bordeaux, France, University of Bordeaux, France

Aniket Mishra, INSERM U1219 Bordeaux Population Health Research Center, Bordeaux, France, University of Bordeaux, France

Lawrence Wee. Data Analytics Department, Institute for Infocomm Research (I2R). Singapore, Singapore

Saima Siddiqi. Institute of Biomedical and Genetic Engineering. Islamabad, Pakistan



Jer-Yuarn Wu. Institute of Biomedical Sciences, Academia Sinica. Taipei, Taiwan

Tai-Ming Ko. Institute of Biomedical Sciences, Academia Sinica, Graduate Institute of Integrated Medicine, China Medical University. Taipei, Taiwan

Silvia Bione. Computational Biology Unit, Institute of Molecular Genetics–National Research Council. Pavia, Italy

Katarina Jood. Department of Clinical Neuroscience, Institute of Neuroscience and Physiology, Sahlgrenska Academy at University of Gothenburg. Gothenburg, Sweden

Turgut Tatlisumak. Department of Clinical Neuroscience, Institute of Neuroscience and Physiology, Sahlgrenska Academy at University of Gothenburg, Sahlgrenska University Hospital. Gothenburg, Sweden

Lukas Holmegaard. Department of Clinical Neuroscience, Institute of Neuroscience and Physiology, Sahlgrenska Academy at University of Gothenburg. Gothenburg, Sweden

Antonio Arauz. Stroke Clinic, Instituto Nacional de Neurologia y Neurocirugia, Manuel Velasco Suarez. Mexico City, Mexico

Michal Korostynski. Department of Molecular Neuropharmacology, Polish Academy of Sciences. Warsaw, Poland

Lenore Launer. Laboratory of Epidemiology and Population Science, Intramural Research Program, National Institutes of Health, National Institute on Aging. Bethesda, MD, USA

Suo Yue. Ion Torrent by Life Technologies (company), Carnegie Mellon University. San Francisco, CA, USA

Anna Bersano. Cerebrovascular Unit, IRCCS Foundation C. Besta Neurological Institute. Milan, Italy

Tomasz Dziedzic. Department of Neurology, Jagiellonian University. Krakow, Poland

Karol Józef Juchniewicz. Jagiellonian University. Krakow, Poland

Adamski Mateusz. Jagiellonian Centre for Experimental Therapeutics, Jagiellonian University. Krakow, Poland

Joanna Pera. Department of Neurology, Jagiellonian University Medical College. Krakow, Poland

Agnieszka Slowik. Department of Neurology, Jagiellonian University Medical College. Krakow, Poland

Andrzej Urbanik. Department of Radiology, Jagiellonian University Medical College. Krakow, Poland

Jerzy Gasowski. Department of Internal Medicine and Gerontology, Jagiellonian University Medical College. Krakow, Poland

Rafał Olszanecki. Faculty of Medicine, Jagiellonian University Medical College. Krakow, Poland

Marcin Wnuk. Jagiellonian University Medical College. Krakow, Poland

Christopher Levi. John Hunter Hospital, Hunter Medical Research Institute and University of Newcastle. Newcastle, Australia

Aaron Gusdon. Department of Neurology, Johns Hopkins Medicine, University of Pittsburgh School of Medicine. Baltimore, MD, USA

Konstantinos Kostulas. Department of Clinical Neuroscience, Karolinska Institute. Stockholm, Sweden

Milita Crisby. Division of Clinical Geriatrics, Neurobiology Care Sciences and Society, Karolinska Institute. Huddinge, Sweden

Lina Keller. Karolinska Institutet. Stockholm, Sweden

Kristina Schlicht. Institut für Medizinische Informatik und Statistik, Kiel University. Kiel, Germany

Jessye Maxwell. Social genetic and Developmental Psychiatry, King's College London. London, UK

Christof Haffner. Institute for Stroke and Dementia Research, Klinikum der Universität München. Munich, Germany

Marco Duering. Institute for Stroke and Dementia Research, Klinikum der Universität München, Ludwig-Maximilians-University LMU. Munich, Germany

Jeremiasz Jagiella. Krakow University Hospital. Krakow, Poland

Robin Lemmens. Department of Neurosciences, Experimental Neurology, KU Leuven – University of Leuven, Department of Neurology, University Hospitals Leuven, VIB Center for Brain & Disease Research. Leuven, Belgium

Jun Hata. Department of Epidemiology and Public Health, Kyushu University, Graduate School of Medical Sciences. Fukuoka, Japan



Toshiharu Ninomiya. Department of Epidemiology and Public Health, Kyushu University, Graduate School of Medical Sciences. Fukuoka, Japan

Vinh Nguyen. School of Psychological Science, La Trobe University. Melbourne, Australia

Bjorn Logi Thorarinsson. Department of Neurology, Landspítali Háskólasjúkrahús. Reykjavík, Iceland

Saskia Lesnik Oberstein. Department of Clinical Genetics, Leiden University Medical Center. Leiden, Netherlands

Tsong-Hai Lee. Neurology department and Stroke center, Linkou Chang Gung Memorial Hospital. Taipei, Taiwan

Alexandr Rakitko. Lomonosov Moscow State University. Moscow, Russia

Rainer Malik. Institute for Stroke and Dementia Research, Ludwig-Maximilians-University, Klinikum der Universität München. Munich, Germany

Martin Dichgans. Institute for Stroke and Dementia Research, Ludwig-Maximilians-University, Klinikum der Universität München, Munich Cluster for Systems Neurology (SyNergy). Munich, Germany

Arne Lindgren. Department of Clinical Sciences Lund, Neurology, Lund University, Department of Neurology and Rehabilitation Medicine, Skåne University Hospital. Lund, Sweden

Johan Wasselius. Department of Clinical Sciences Malmö, Lund University, Vascular Center, Skåne University Hospital. Malmö, Sweden

Mattias Drake. Diagnostic Radiology, Lund University. Lund, Sweden

Olle Melander. Department of Clinical Sciences, Lund University. Lund, Sweden

Martin Stenman. Geriatric Medicine, Lund University. Lund, Sweden

Andreea Ilinca. Neurology, Lund University. Lund, Sweden

Julie Staals. Department of Neurology, Maastricht University Medical Center (MUMC+), Cardiovascular Research Institute Maastricht (CARIM). Maastricht, Netherlands

Ariane Sadr-Nabavi. Medical Genetics Research Center (MGRC), Mashhad University of Medical Sciences (MUMS), School of Medicine, Department of Medical Genetics, Mashhad University of Medical Sciences (MUMS), Faculty of Medicine. Mashhad, Iran

Katherine Crawford. Center for Genomic Medicine, Massachusetts General Hospital. Boston, MA, USA

Jose Florez. Center for Human Genetic Research, MGH, Massachusetts General Hospital, Harvard Medical School. Boston, MA, USA

Umme Lena. Massachusetts General Hospital, South Hadley, MA, USA

Farrah Mateen. Department of Neurology, Massachusetts General Hospital. Boston, MA, USA

Hakan Ay. Department of Neurology, Massachusetts General Hospital. Boston, MA, USA

Ona Wu. Department of Neurology, JPK Stroke Research Center, Massachusetts General Hospital and Harvard Medical School, Department of Radiology, Athinoula A. Martinos Center for Biomedical Imaging, MGH. Boston, MA, USA

Markus Schirmer. Department of Neurology, J. Philip Kistler Stroke Research Centre, Massachusetts General Hospital and Harvard Medical School. Boston, MA, USA

Javier Romero. Division of Neurocritical Care and Emergency Neurology, Department of Neurology, Massachusetts General Hospital, Harvard Medical School, J. P. Kistler Stroke Research Center, Massachusetts General Hospital, Harvard Medical School. Boston, MA, USA

Steve Cramer. Neurology, Anatomy & Neurobiology, and Physical Medicine & Rehabilitation, University of California Irvine. Irvine, CA, USA

Polina Golland. The Computer Science and Artificial Intelligence Laboratory, Massachusetts Institute of Technology. Cambridge, MA, USA

Bertram Mueller-Myhsok. Max-Planck-Institute of Psychiatry. Munich, Germany

Robert Brown. Department of Neurology, Mayo Clinic. Rochester, MN, USA

James Meschia. Department of Neurology, Mayo Clinic. Jacksonville, FL, USA

Owen A. Ross. Department of Medical Genetics and Neuroscience, Mayo Clinic. Jacksonville, FL, USA

Thomas Brott. Neurology, Mayo Clinic, Department of Surgery, University of Medicine and Dentistry of New Jersey. Jacksonville, FL, USA

Guillaume Pare. Population Health Research Institute, McMaster University. Hamilton, Ontario, Canada



Mike Chong. Population Health Research Institute, McMaster University. Hamilton, Ontario, Canada

Ossama Yassin Mansour. Department of Neurology, Medical School of Alexandria. Alexandria Governorate, Egypt

Bartosz Karaszewski. Department of Adult Neurology, Medical University of Gdansk & University Clinical Centre in Gdansk. Gdansk, Poland

Christian Enzinger. Department of Neurology, Medical University of Graz. Graz, Austria

Helena Schmidt. Institute of Molecular Biology and Biochemistry, Medical University of Graz. Graz, Austria

Reinhold Schmidt. Department of Neurology, Medical University of Graz. Graz, Austria

Stephan Seiler. Department of Neurology, Medical University of Graz. Graz, Austria

Alexander Pichler. Department of Neurology, Medical University of Graz. Graz, Austria

Bruce Ovbiagele. Department of Neurology, Medical University of South Carolina. Charleston, SC, USA

Yoshiji Yamada. Department of Human Genomics, Mie University, Life Science Research Center. Mie, Japan

Tatjana Rundek. Department of Neurology, Miller School of Medicine, University of Miami. Miami, FL, USA

Susan Blanton. John P. Hussman Institute for Human Genomics, Miller School of Medicine, University of Miami. Miami, FL, USA

Joseph Chern. Department of Neurology, College of Medicine, National Cheng Kung University. Tainan, Taiwan

Chris O'Donnell. Cardiovascular Epidemiology and Human Genomics Branch, National Heart, Lung and Blood Institute, Intramural Research, Veterans Administration Healthcare, Center for Population Genomics. Boston, MA, USA

Roderick Corriveau. National Institute of Neurological Disorders and Stroke, National Institute of Health, University of California. Bethesda, MD, USA

Pallab Bhattacharya. National Institute of Pharmaceutical Education and Research. Ahmedabad, India

Andrew Singleton. Laboratory of Neurogenetics, National Institute on Aging, Intramural Research Program. Bethesda, MD, USA

Katrina Gwinn. National Institute of Neurological Disorders and Stroke, National Institutes of Health. Bethesda, MD, USA

Bharatendu Chandra. General Neurology and Stroke, National University Hospital. Singapore, Singapore

Christopher Chen. Department of Pharmacology, National University of Singapore. Singapore, Singapore

Raj Kalaria. Institute of Neuroscience, Newcastle University. Newcastle, UK

Jim Koenig. Division of Neuroscience, Stroke Program in the Neural Environment, NINDS. Bethesda, MD, USA

Om Prakash Singh. Department of Environmental Studies, North Eastern Hill University (NEHU). Shillong, India

Akintomi Olugbodi. Obafemi Awolowo University. Ile-Ife, Nigeria

Bishwa Sapkota. Harold Hamm Diabetes Center, Oklahoma University. Oklahoma City, OK, USA

Rebecca Jackson. Center for women's health, Ohio State University Wexner Medical Center. Columbus, OH, USA

Eva Giralt. Parc de Salut Mar. Barcelona, Spain

Danish Saleheen. Department of Genetics, Perelman School of Medicine, University of Pennsylvania. Philadelphia, Pennsylvania, USA

Frank-Erik de Leeuw. Department of Neurology, Radboud University Medical Center. Nijmegen, Netherlands

Karin Klijn. Department of Neurology, Radboud University Medical Centre, Donders Institute for Brain, Cognition and Behaviour, Department of Neurology and Neurosurgery, University Medical Center, Brain Center Rudolf Magnus. Nijmegen, Netherlands

Jes Olesen. Department of Clinical Medicine, Rigshospitalet – Neurocentret. Glostrup, Denmark

Yoichiro Kamatani. Laboratory for Statistical Analysis, RIKEN Center for Integrative Medical Sciences, Center for Genomic Medicine, Kyoto University Graduate School of Medicine. Yokohama, Japan



Michiaki Kubo. RIKEN Center for Integrative Medical Sciences. Yokohama, Japan

Yukinori Okada. Laboratory for Statistical Analysis, RIKEN Center for Integrative Medical Sciences, Department of Statistical Genetics, Osaka University Graduate School of Medicine. Yokohama, Japan

David Spence. Stroke Prevention & Atherosclerosis Research Centre, Robarts Research. London, Ontario, Canada

Annie Pedersen. Västra Vöralandsregionen, Sahlgrenska Academy at University of Gothenburg. Gothenburg, Sweden

Maja Olsson. Department of Medical and Clinical Genetics, Institute of Biomedicine, Sahlgrenska Academy at University of Gothenburg. Gothenburg, Sweden

Turgut Tatlisumak. Department of Clinical Neurosciences/Neurology, Sahlgrenska Academy at University of Gothenburg, Institute of Neuroscience and Physiology, Sahlgrenska University Hospital. Gothenburg, Sweden

Giacomo Giacalone. Neurology Department, San Raffaele Scientific Institute, University Vita-Salute San Raffaele. Milan, Italy

Juan José Martín. Department of Neurology, Sanatorio Allende. Cordoba, Argentina

Rodrigo Bazan. Department of Neurology, São Paulo State University (Unesp) Botucatu Medical School. Botucatu, Brazil

Gabriel Braga. Hospital das Clínicas, São Paulo State University (Unesp) Botucatu Medical School. Botucatu, Brazil

Steve Bevan. School of Life Science, University of Lincoln. Lincoln, UK

Huichun Xu. Medicine department, School of Medicine, University of Maryland. Baltimore, MD, USA

Tim Assimes. Cardiovascular Medicine, School of Medicine, Stanford University. Stanford, CA, USA

Jamie Wright. Anderson Cancer Center, MD Anderson Clinical Cancer Genetics, School of Medicine, University of Texas. Houston, TX, USA

Anton Raskurazhev. Scientific Center of Neurology. Moscow, Russia

Wei Ling Lee. National Neuroscience Institute, Singapore General Hospital, Department of Pediatrics, National University of Singapore, Yong Loo Lin School of Medicine. Singapore, Singapore

Eng King Tan. Department of Neurology, Singapore General Hospital, National Neuroscience Institute, Neuroscience and Behavioral Disorders Program, Duke-National University of Singapore Graduate Medical School. Singapore, Singapore

Philippe Burri. Department of Cardiology, Skane University Hospital. Malmö, Sweden

Petrea Frid. Critical Care Neurology, Skåne University Hospital, Lund University. Malmö, Sweden

Christian Opherke. Department of Neurology, SLK-Kliniken Heilbronn GmbH. Heilbronn, Germany

Chaeyoung Lee. Department of Bioinformatics and Life Science, Soongsil University. Seoul, Korea

David Tregouet. Team Genomics and Pathophysiology of Cardiovascular Diseases, Sorbonne Universités, UPMC Univ. Paris 06, INSERM, UMR\_S 1166, ICAN Institute for Cardiometabolism and Nutrition. Paris, France

Zhen Deng. Department of Neurology, Southern Medical University, FIMMU. Guangzhou, China

Hung Yi Chiou. School of Public Health, College of Public Health and Nutrition, Taipei Medical University. Taipei, Taiwan

Mahdi Habibi-Koolaei. Department of Health Information Management, Tehran University of Medical Sciences (TUMS). Tehran, Iran

Murali Vijayan. Garrison Institute on Aging, Texas Tech University Health Sciences Center. Lubbock, TX, USA

Thomas Leung. Division of Neurology, Department of Medicine and Therapeutics, The Chinese University of Hong Kong. Hong Kong, Hong Kong

Lawrence Wong. Division of Neurology, Department of Medicine and Therapeutics, The Chinese University of Hong Kong. Hong Kong, Hong Kong

Vincent Mok. Department of Medicine and Therapeutics, The Chinese University of Hong Kong. Hong Kong, Hong Kong



Richard Choy. Department of Obstetrics and Gynecology, The Chinese University of Hong Kong. Hong Kong, Hong Kong

Christina Jern. Department of Pathology and Genetics, The Sahlgrenska Academy at University of Gothenburg, Institute of Biomedicine. Gothenburg, Sweden

Elena Lebedeva. Department of Neurology and Neurosurgery, The Urals State Medical University, International Headache Center 'Europe-Asia'. Yekaterinburg, Russia

Martin Farrall. Department of Cardiovascular Medicine, The Wellcome Trust Centre for Human Genetics. Oxford, UK

Xu Jiayuan. Department of Radiology, Tianjin Medical University (TIJMU). Tianjin, China

Keat Wei Loo. Tunku Abdul Rahman University, UTAR. Kampar Perak, Malaysia

Isabel Hostettler. Stroke Research Center, UCL Institute of Neurology. London, UK

Gabriel Rinkel. Department of Neurology and Neurosurgery, UMC Utrecht, Brain Center Rudolf Magnus. Utrecht, Netherlands

Anderson Goncalves. Universidade da Região de Joinville. Joinville, Brazil

Paulo Franca. Department of Medicine, Universidade da Região de Joinville-Univille. Joinville, Brazil

Norberto Cabral. Department of Medicine, Universidade da Região de Joinville (Univille). Joinville, Brazil

Iscia Cendes. Molecular Genetics Laboratory, Universidade Estadual de Campinas, Faculdade de Ciências Médicas. Campinas, Brazil

Caty Carrera. Neurovascular Research Laboratory, Vall d'Hebron Institut of Research, Neurology and Medicine Departments, Universitat Autònoma de Barcelona, Vall d'Hebrón Hospital, Stroke Pharmacogenomics and Genetics, Fundacio Docència i Recerca Mutua Terrassa. Barcelona, Spain

Israel Fernandez-Cadenas. Neurovascular Research Laboratory, Vall d'Hebron Institut of Research, Neurology and Medicine Departments, Universitat Autònoma de Barcelona, Vall d'Hebrón Hospital, Stroke Pharmacogenomics and Genetics, Fundacio Docència i Recerca Mutua Terrassa. Barcelona, Spain

Joan Montaner. Neurovascular Research Laboratory, Universitat Autònoma de Barcelona, Vall d'Hebron Institute of Research, Neurology Department, Hospital Vall d'Hebron. Barcelona, Spain

Helen Kim. Institute for Human Genetics. The Center for Cerebrovascular Research (CCR). University of California. San Francisco, CA, USA

Arndt Rolfs. Albrecht Kossel Institute, University Clinic of Rostock. Rostock, Germany

Mayowa Owolabi. Department of Neurology, University College Hospital. Ibadan, Nigeria

Reecha Sofat. Metabolism & Experimental Therapeutics, Division of Medicine, Faculty of Medical Sciences, University College London. London, UK

Mark Bakker. University Medical Center Utrecht. Utrecht, Netherlands

Dominique PV de Kleijn. Laboratory of Experimental Cardiology, University Medical Center Utrecht, ICIN-Netherlands Heart Institute. Utrecht, Netherlands

Ynte Ruigrok. Department of Neurology and Neurosurgery, University Medical Center Utrecht, Brain Center Rudolf Magnus, The Dutch Parelstoer Institute-Cerebrovascular accident (CVA) Study Group. Utrecht, Netherlands

Allard Hauer. Department of Neurology and Neurosurgery, University Medical Center Utrecht, Brain Center Rudolf Magnus. Utrecht, Netherlands

Sara L. Pulit. Department of Neurology, University Medical Center Utrecht, Brain Center Rudolf Magnus. Utrecht, Netherlands

Ale Algra. Department of Neurology and Neurosurgery, University Medical Center Utrecht, Brain Center Rudolf Magnus, Julius Center for Health Sciences and Primary Care, University Medical Center Utrecht. Utrecht, Netherlands

Sander W. van der Laan. Laboratory of Experimental Cardiology, University Medical Center Utrecht, Division of Heart and Lungs. Utrecht, Netherlands

Mary Macleod. Department of Medicine & Therapeutics, University of Aberdeen, King's College. Aberdeen, UK

George Howard. School of Public Health, University of Alabama at Birmingham. Birmingham, AL, USA



Hemant Tiwari. Department of Biostatistics, University of Alabama at Birmingham. Birmingham, AL, USA

Ryan Irvin. Department of Epidemiology, University of Alabama at Birmingham. Birmingham, AL, USA

Karen C. Albright. Neurology, University of Alabama Hospital, Spectrum Health – Butterworth Campus. Birmingham, AL, USA

Rodney Perry. Department of Epidemiology, University of Alabama School of Medicine. Birmingham, AL, USA

Chelsea Kidwell. Department of Neurology, University of Arizona. Tucson, AZ, USA

Aleksandra Pavlovic. Neurology Clinic, Clinical Center of Serbia, University of Belgrade, Faculty of Medicine. Belgrade, Serbia

Christophe Tzourio. University of Bordeaux, INSERM U1219. Bordeaux, France

Murali Sargurupremraj. INSERM U1219 Bordeaux Population Health Research Center, University of Bordeaux. Bordeaux, France

Sabrina Schilling. University of Bordeaux. Bordeaux, France

Alessandro Padovani. Department of Clinical and Experimental Sciences, University of Brescia. Brescia, Italy

Alessandro Pezzini. Department of Clinical and Experimental Sciences, University of Brescia, Neurology Clinic. Brescia, Italy

Foad Abd-Allah. Department of Neurology, University of Cairo. Cairo, Egypt

Charles DeCarli. Alzheimer's Disease Center, University of California Davis. Davis, CA, USA

Yuqi Zhao. Department of Integrative Biology and Physiology, University of California. Los Angeles, CA, USA

David Liebeskind. Department of Neurology, University of California. Los Angeles, CA, USA

Matthew Traylor. Stroke Research Group, Division of Clinical Neurosciences, University of Cambridge. Cambridge, UK

Rhea Tan. Department of Clinical Neurosciences, University of Cambridge. Cambridge, UK

John Danesh. MRC/BHF Cardiovascular Epidemiology Unit, Department of Public Health and Primary Care, University of Cambridge, The National Institute for Health Research Blood and Transplant Research Unit in Donor Health and Genomics, Wellcome Trust Sanger Institute. Cambridge, UK

Susanna C. Larsson. Department of Clinical Neurosciences, Neurology Unit, University of Cambridge. Cambridge, UK

Loes Rutten-Jacobs. Stroke Research Group, University of Cambridge, Division of Clinical Neurosciences, DZNE. Cambridge, UK

Amanda Donatti. School of Medical Sciences, FCM, University of Campinas, UNICAMP. São Paulo, Brazil

Wagner Avelar. Department of Neurology, University of Campinas, UNICAMP. São Paulo, Brazil

Joseph Broderick. Gardner Neuroscience Institute, Comprehensive Stroke Center, University of Cincinnati. Cincinnati, OH, USA

Daniel Woo. University of Cincinnati College of Medicine. Cincinnati, OH, USA

Brett Kissela. Department of Neurology and Rehabilitation Medicine, University of Cincinnati Gardner Neuroscience Institute, Comprehensive Stroke Center. Cincinnati, OH, USA

Laura Garcia Ibenez. Institute for Cancer Genetics, University of Columbia. New York, NY, USA

Rustam Salman. Centre for Clinical Brain Sciences, University of Edinburgh. Edinburgh, UK

Cathie Sudlow. Centre for Medical Informatics, Usher Institute, University of Edinburgh. Edinburgh, UK

Kristiina Rannikmäe. Centre for Medical Informatics, Usher Institute, University of Edinburgh. Edinburgh, UK

Caitrin Wheeler McDonough. College of Pharmacy, University of Florida. Gainesville, FL, USA

Scott Silliman. Department of Neurology, University of Florida College of Medicine. Jacksonville, FL, USA

Oyunbileg Magvanjav. Department of Pharmacotherapy and Translational Research and Center for Pharmacogenomics, University of Florida, College of Pharmacy. Gainesville, FL, USA

Tom van Agtmael. Institute of Cardiovascular and Medical Sciences, University of Glasgow. Glasgow, UK

Matthew Walters. School of Medicine, Dentistry and Nursing, University of Glasgow. Glasgow, UK

Martin Söderholm. Bioinformatics Core Facility, University of Gothenburg. Gothenburg, Sweden



Erik Lorentzen. Bioinformatics Core Facility, University of Gothenburg. Gothenburg, Sweden

Sandra Olsson. University of Gothenburg. Gothenburg, Sweden

Tara Stanne. University of Gothenburg. Gothenburg, Sweden

Martina Olsson. University of Gothenburg. Gothenburg, Sweden

Kazuma Nakagawa. University of Hawaii, John A. Burns School of Medicine, Department of Neurology, The Queen's Medical Center. Honolulu, HI, USA

Rufus Akinyemi. Institute for Advanced Medical Research and Training, University of Ibadan, College of Medicine. Ibadan, Nigeria

Ioana Cotlatciuc. Institute of Cardiovascular Research Royal Holloway, University of London. London, UK

Jeff O'Connell. Medicine department, University of Maryland, Animal Genetics Improvement Laboratory, United States Department of Agriculture. Baltimore, MD, USA

Mary Sparks. Department of Neurology, University of Maryland. Baltimore, MD, USA

John Sorkin. Department of Neural and Pain Sciences, University of Maryland. Baltimore, MD, USA

Patrick McArdle. Division of Endocrinology, Diabetes and Nutrition, University of Maryland School of Medicine. Baltimore, MD, USA

Tushar Dave. Bioinformatics, University of Maryland School of Medicine. Baltimore, MD, USA

Colin Stine. Epidemiology & Public Health, University of Maryland School of Medicine. Baltimore, MD, USA

Steven Kittner. Department of Neurology, University of Maryland School of Medicine and Baltimore VAMC. Baltimore, MD, USA

Jill Naylor. University of Melbourne. Melbourne, Australia

Devin Brown. Department of Neurovascular, University of Michigan Medical School. Ann Arbor, MI, USA

Mario Di Napoli. Department of Neurology, University of Naples. Naples, Italy

Rose Du. Comprehensive Cancer Center, University of New Mexico. Albuquerque, NM, USA

Tobias B. Kulik. Neurology, University of New Mexico. Albuquerque, NM, USA

John Attia. School of Medicine and Public Health, University of Newcastle. New Lambton, Australia

Shahbaz Zamani. University of Newcastle. Newcastle, Australia

James E Faber. Cell Biology and Physiology, University of North Carolina. Chapel Hill, NC, USA

Peter Rothwell. Nuffield Department of Clinical Neurosciences, University of Oxford. Oxford, UK

Iona Millwood. Nuttfield Department of Population Health, University of Oxford. Oxford, UK

Elsa Valdés Márquez. CTSU–Clinical Trial Service Unit and Epidemiological Studies Unit, University of Oxford. Oxford, UK

Michelangelo Mancuso. Department of Neurology, University of Pisa. Pisa, Italy

Doralina Brum Souza. Department of Neurology, University of Sao Paulo. Ribeirao Preto, Brazil

Ranil de Silva. Genetic, Diagnostic and Research Laboratory, Department of Anatomy, University of Sri Jayewardenepura, Faculty of Medical Sciences. Nugegoda, Sri Lanka

Riina Vibo. Department of Neurology and Neurosurgery, University of Tartu. Tartu, Estonia

Janika Korv. Department of Neurology and Neurosurgery, University of Tartu. Tartu, Estonia

Jane Maguire. Faculty of Health, University of Technology Sydney. Ultimo, Australia

Myriam Fornage. Brown Foundation Institute of Molecular Medicine // Human Genetics Center, University of Texas Health Science Center at Houston. Houston, TX, USA

Kachikwu Illoh. University of Texas Medical School. Houston, TX, USA

Dianna Milewicz. Division of Medical Genetics, University of Texas Health Science Center, McGovern Medical School, Department of Internal Medicine, University of Texas Health Science Center, McGovern Medical School. Houston, TX, USA

Jennifer Majersik. Neurology, University of Utah. Salt Lake City, UT, USA

Adam DeHavenon. Department of Neurology, University of Utah. Salt Lake City, UT, USA

Yashar Kalani. Neurobiology and Anatomy, University of Utah School of Medicine. Salt Lake City, UT, USA

Matthew Alexander. Radiology and Imaging Sciences, University of Utah School of Medicine, Neurosurgery, University of Utah School of Medicine. Salt Lake City, UT, USA



Mary Cushman. Department of Hematology and Oncology, University of Vermont, Medical Center. Colchester, VT, USA

Michele Sale. Center for Public Health Genomics, University of Virginia. Charlottesville, VA, USA

Andrew Southerland. Departments of Neurology and Public Health Sciences, University of Virginia. Charlottesville, VA, USA

Debra Owens. Newborn Intensive Care Units, University of Virginia Children's Hospital. Charlottesville, VA, USA

Keith Keene. Center for Public Health Genomics, University of Virginia School of Medicine. Charlottesville, VA, USA

Stephen Rich. Center for Public Health Genomics, University of Virginia School of Medicine. Charlottesville, VA, USA

Bruce Psaty. Cardiovascular Health Research Unit, Department of Medicine, University of Washington, Department of Epidemiology, University of Washington. Seattle, WA, USA

Will Longstreth. Department of Epidemiology, University of Washington, Department of Neurology, University of Washington. Seattle, WA, USA

Masharip Atadzhanov. Department of Neurology, University Teaching Hospital. Lusaka, Zambia

Stacey Quintero Wolfe. Wake Forest Baptist Health. Winston-Salem, NC, USA

Carl Langefeld. Center for Public Health Genomics and Department of Biostatistical Sciences, Wake Forest School of Medicine. Winston-Salem, NC, USA

Cheryl Bushnell. Department of Neurology, Wake Forest University Medical Center. Winston-Salem, NC, USA

Carlos Cruchaga. Department of Psychiatry, The Hope Center Program on Protein Aggregation and Neurodegeneration (HPAN), Washington University School of Medicine, Department of Developmental Biology, Washington University School of Medicine. St. Louis, MO, USA

Jan Konrad. Department of Psychiatry, The Hope Center Program on Protein Aggregation and Neurodegeneration (HPAN), Washington University, School of Medicine. St. Louis, MO, USA

Junfeng Liu. West China Medical School, Sichuan University. Sichuan, China

Kevin Sheth. Department of Neurology, Neuro Intensive Care & Neurological Emergencies, Yale School of Medicine. New Haven, CT, USA

Guido Falcone. Department of Neurology, Yale University School of Medicine, Program in Medical and Population Genetics, The Broad Institute of Harvard and MIT. New Haven, CT, USA

Kathleen Donahue. J. Philip Kistler Stroke Research Center, Massachusetts General Hospital. Boston, MA, USA
